# Supplementary material for: A sequence-based global map of regulatory activity for deciphering human genetics
Source: PubMed Central journal article supplement (PMC9279145; doi:10.1038/s41588-022-01102-2), 2022-07-11
Supplement: 41588_2022_1102_MOESM4_ESM.pdf [file 41588_2022_1102_MOESM4_ESM.pdf]

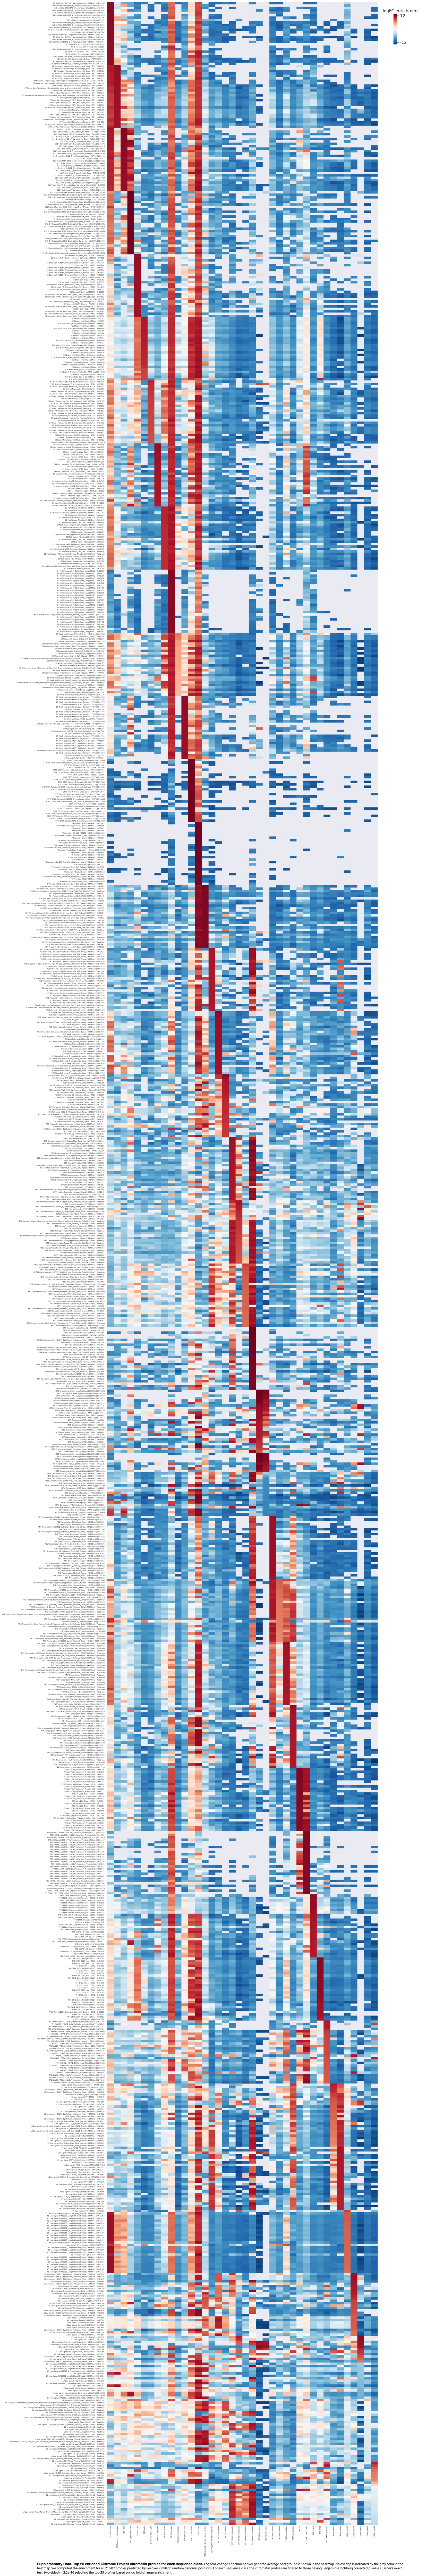

Supplementary Data 2a. Top 25 enriched top25 profiles based on sequence class. Log fold change enrichment for 12 sequence classes. Log fold change enrichment is shown in the heatmap. No overlap is indicated by the grey color in the heatmap. The 12 sequence classes are: E1, E2, E3, E4, E5, E6, E7, E8, E9, E10, E11, E12. The 1000+ genomic profiles are: E1, E2, E3, E4, E5, E6, E7, E8, E9, E10, E11, E12, E13, E14, E15, E16, E17, E18, E19, E20, E21, E22, E23, E24, E25, E26, E27, E28, E29, E30, E31, E32, E33, E34, E35, E36, E37, E38, E39, E40, E41, E42, E43, E44, E45, E46, E47, E48, E49, E50, E51, E52, E53, E54, E55, E56, E57, E58, E59, E60, E61, E62, E63, E64, E65, E66, E67, E68, E69, E70, E71, E72, E73, E74, E75, E76, E77, E78, E79, E80, E81, E82, E83, E84, E85, E86, E87, E88, E89, E90, E91, E92, E93, E94, E95, E96, E97, E98, E99, E100, E101, E102, E103, E104, E105, E106, E107, E108, E109, E110, E111, E112, E113, E114, E115, E116, E117, E118, E119, E120, E121, E122, E123, E124, E125, E126, E127, E128, E129, E130, E131, E132, E133, E134, E135, E136, E137, E138, E139, E140, E141, E142, E143, E144, E145, E146, E147, E148, E149, E150, E151, E152, E153, E154, E155, E156, E157, E158, E159, E160, E161, E162, E163, E164, E165, E166, E167, E168, E169, E170, E171, E172, E173, E174, E175, E176, E177, E178, E179, E180, E181, E182, E183, E184, E185, E186, E187, E188, E189, E190, E191, E192, E193, E194, E195, E196, E197, E198, E199, E200, E201, E202, E203, E204, E205, E206, E207, E208, E209, E210, E211, E212, E213, E214, E215, E216, E217, E218, E219, E220, E221, E222, E223, E224, E225, E226, E227, E228, E229, E230, E231, E232, E233, E234, E235, E236, E237, E238, E239, E240, E241, E242, E243, E244, E245, E246, E247, E248, E249, E250, E251, E252, E253, E254, E255, E256, E257, E258, E259, E260, E261, E262, E263, E264, E265, E266, E267, E268, E269, E270, E271, E272, E273, E274, E275, E276, E277, E278, E279, E280, E281, E282, E283, E284, E285, E286, E287, E288, E289, E290, E291, E292, E293, E294, E295, E296, E297, E298, E299, E300, E301, E302, E303, E304, E305, E306, E307, E308, E309, E310, E311, E312, E313, E314, E315, E316, E317, E318, E319, E320, E321, E322, E323, E324, E325, E326, E327, E328, E329, E330, E331, E332, E333, E334, E335, E336, E337, E338, E339, E340, E341, E342, E343, E344, E345, E346, E347, E348, E349, E350, E351, E352, E353, E354, E355, E356, E357, E358, E359, E360, E361, E362, E363, E364, E365, E366, E367, E368, E369, E370, E371, E372, E373, E374, E375, E376, E377, E378, E379, E380, E381, E382, E383, E384, E385, E386, E387, E388, E389, E390, E391, E392, E393, E394, E395, E396, E397, E398, E399, E400, E401, E402, E403, E404, E405, E406, E407, E408, E409, E410, E411, E412, E413, E414, E415, E416, E417, E418, E419, E420, E421, E422, E423, E424, E425, E426, E427, E428, E429, E430, E431, E432, E433, E434, E435, E436, E437, E438, E439, E440, E441, E442, E443, E444, E445, E446, E447, E448, E449, E450, E451, E452, E453, E454, E455, E456, E457, E458, E459, E460, E461, E462, E463, E464, E465, E466, E467, E468, E469, E470, E471, E472, E473, E474, E475, E476, E477, E478, E479, E480, E481, E482, E483, E484, E485, E486, E487, E488, E489, E490, E491, E492, E493, E494, E495, E496, E497, E498, E499, E500, E501, E502, E503, E504, E505, E506, E507, E508, E509, E510, E511, E512, E513, E514, E515, E516, E517, E518, E519, E520, E521, E522, E523, E524, E525, E526, E527, E528, E529, E530, E531, E532, E533, E534, E535, E536, E537, E538, E539, E540, E541, E542, E543, E544, E545, E546, E547, E548, E549, E550, E551, E552, E553, E554, E555, E556, E557, E558, E559, E560, E561, E562, E563, E564, E565, E566, E567, E568, E569, E570, E571, E572, E573, E574, E575, E576, E577, E578, E579, E580, E581, E582, E583, E584, E585, E586, E587, E588, E589, E590, E591, E592, E593, E594, E595, E596, E597, E598, E599, E600, E601, E602, E603, E604, E605, E606, E607, E608, E609, E610, E611, E612, E613, E614, E615, E616, E617, E618, E619, E620, E621, E622, E623, E624, E625, E626, E627, E628, E629, E630, E631, E632, E633, E634, E635, E636, E637, E638, E639, E640, E641, E642, E643, E644, E645, E646, E647, E648, E649, E650, E651, E652, E653, E654, E655, E656, E657, E658, E659, E660, E661, E662, E663, E664, E665, E666, E667, E668, E669, E670, E671, E672, E673, E674, E675, E676, E677, E678, E679, E680, E681, E682, E683, E684, E685, E686, E687, E688, E689, E690, E691, E692, E693, E694, E695, E696, E697, E698, E699, E700, E701, E702, E703, E704, E705, E706, E707, E708, E709, E710, E711, E712, E713, E714, E715, E716, E717, E718, E719, E720, E721, E722, E723, E724, E725, E726, E727, E728, E729, E730, E731, E732, E733, E734, E735, E736, E737, E738, E739, E740, E741, E742, E743, E744, E745, E746, E747, E748, E749, E750, E751, E752, E753, E754, E755, E756, E757, E758, E759, E760, E761, E762, E763, E764, E765, E766, E767, E768, E769, E770, E771, E772, E773, E774, E775, E776, E777, E778, E779, E780, E781, E782, E783, E784, E785, E786, E787, E788, E789, E790, E791, E792, E793, E794, E795, E796, E797, E798, E799, E800, E801, E802, E803, E804, E805, E806, E807, E808, E809, E810, E811, E812, E813, E814, E815, E816, E817, E818, E819, E820, E821, E822, E823, E824, E825, E826, E827, E828, E829, E830, E831, E832, E833, E834, E835, E836, E837, E838, E839, E840, E841, E842, E843, E844, E845, E846, E847, E848, E849, E850, E851, E852, E853, E854, E855, E856, E857, E858, E859, E860, E861, E862, E863, E864, E865, E866, E867, E868, E869, E870, E871, E872, E873, E874, E875, E876, E877, E878, E879, E880, E881, E882, E883, E884, E885, E886, E887, E888, E889, E890, E891, E892, E893, E894, E895, E896, E897, E898, E899, E900, E901, E902, E903, E904, E905, E906, E907, E908, E909, E910, E911, E912, E913, E914, E915, E916, E917, E918, E919, E920, E921, E922, E923, E924, E925, E926, E927, E928, E929, E930, E931, E932, E933, E934, E935, E936, E937, E938, E939, E940, E941, E942, E943, E944, E945, E946, E947, E948, E949, E950, E951, E952, E953, E954, E955, E956, E957, E958, E959, E960, E961, E962, E963, E964, E965, E966, E967, E968, E969, E970, E971, E972, E973, E974, E975, E976, E977, E978, E979, E980, E981, E982, E983, E984, E985, E986, E987, E988, E989, E990, E991, E992, E993, E994, E995, E996, E997, E998, E999, E1000.
